# Supplementary material for: HCV Phylogeography of the General Population and High-Risk Groups in Cyprus Identifies the Island as a Global Sink for and Source of Infection
Source: PubMed Central journal article supplement (PMC6624375; doi:10.1038/s41598-019-46552-7), 2019-07-11
Supplement: 41598_2019_46552_MOESM1_ESM.pdf [file 41598_2019_46552_MOESM1_ESM.pdf]

# **HCV Phylogeography of the General Population and High-Risk Groups in Cyprus Identifies the Island as a Global Sink for and Source of Infection**

**Dimitrios Paraskevis<sup>1, \*</sup>, Dora C. Stylianiou<sup>2, \*</sup>, Johana Hezka<sup>2</sup>, Zachariah Stern<sup>2</sup>, Martha Oikonomopoulou<sup>1</sup>, Ioannis Mamais<sup>1</sup>, Cyprus PWID Network and Leondios G. Kostrikis<sup>1, \*</sup>**

<sup>1</sup>Department of Hygiene, Epidemiology and Medical Statistics, Medical School, National and Kapodistrian University of Athens, Athens Greece

<sup>2</sup>Department of Biological Sciences, University of Cyprus, Nicosia, Cyprus

+ these authors contributed equally to this work,

\*lkostrik@ucy.ac.cy

## **Supplementary Figures and Tables**

## Supplementary Figure S1A

- China
- Cyprus
- Germany
- Japan
- Switzerland
- Thailand
- United States

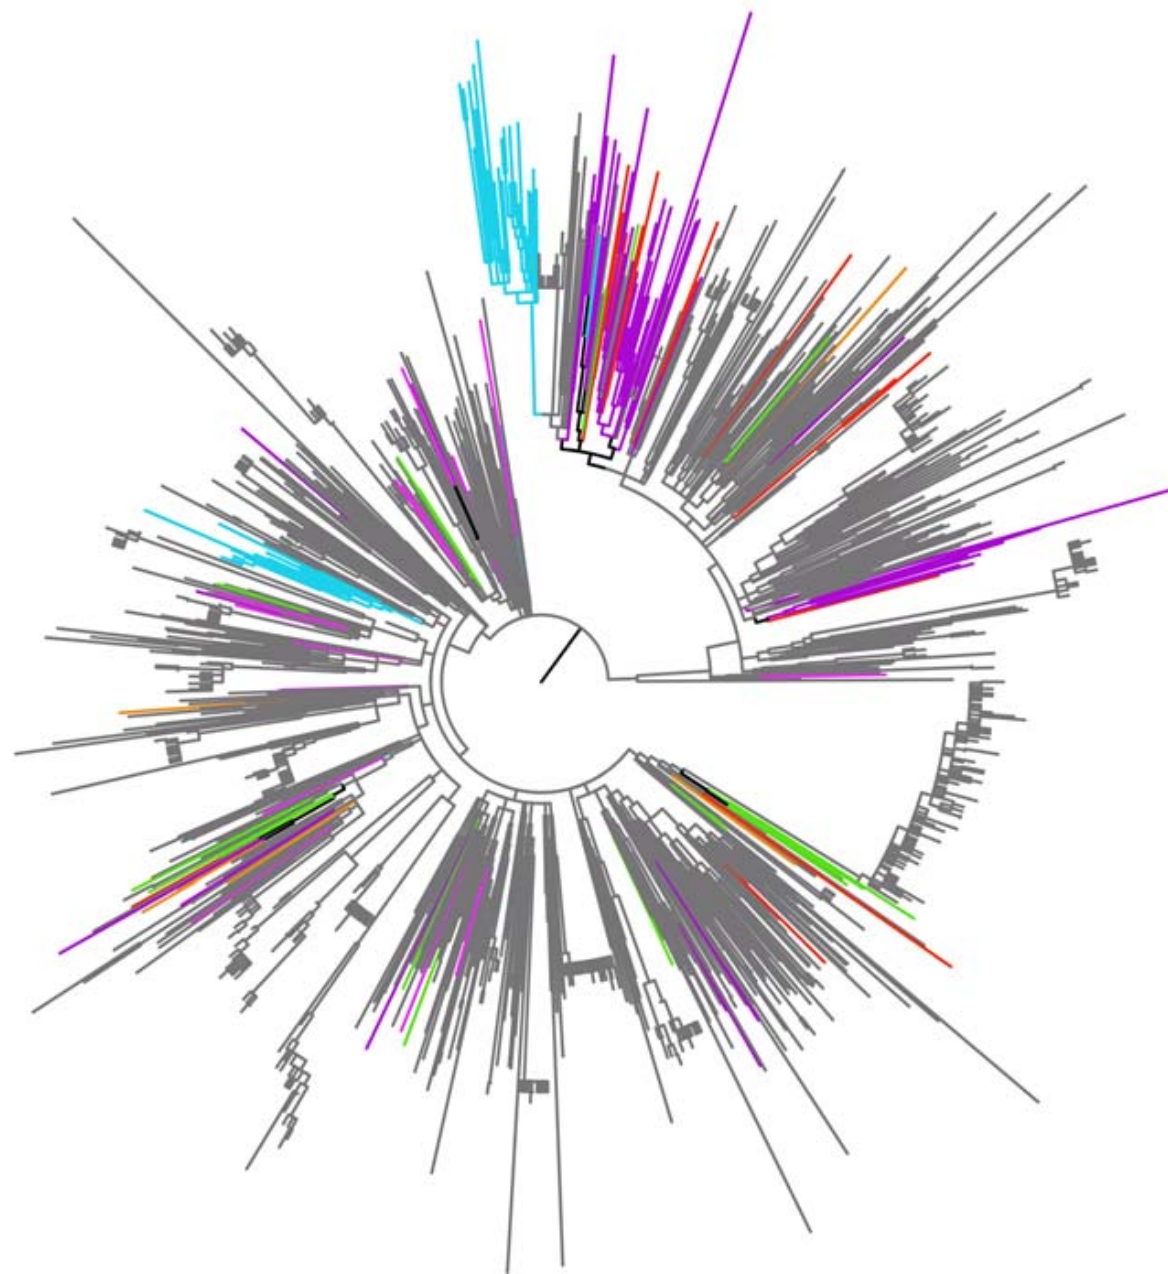

# Supplementary Figure S1B

- Belarus
- China
- Cyprus
- Germany
- Ireland
- Japan
- Russian Federation
- Switzerland
- Tajikistan
- Thailand
- United States
- Uzbekistan

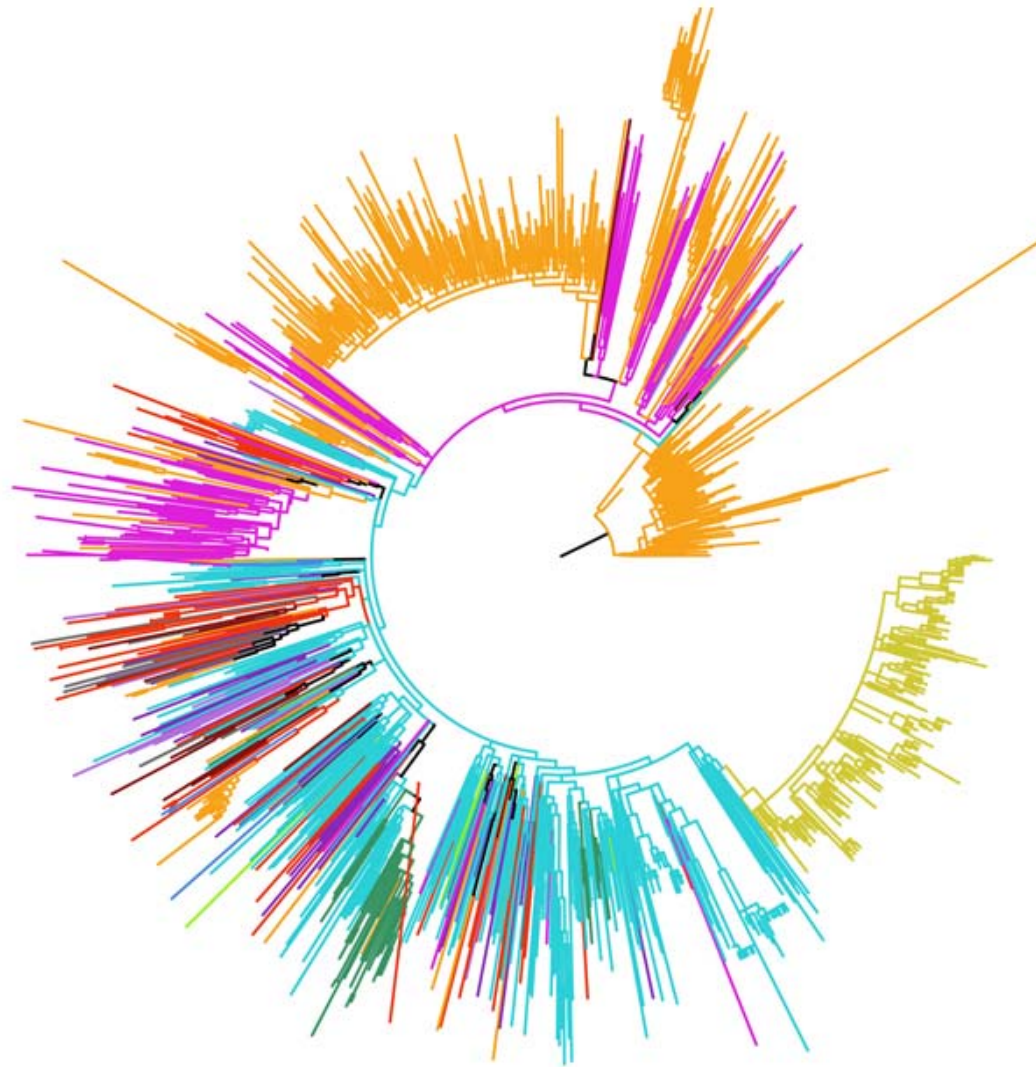

# Supplementary Figure S1C

- Belarus
- China
- Cyprus
- India
- Pakistan
- Thailand
- United Kingdom
- United States
- Uzbekistan

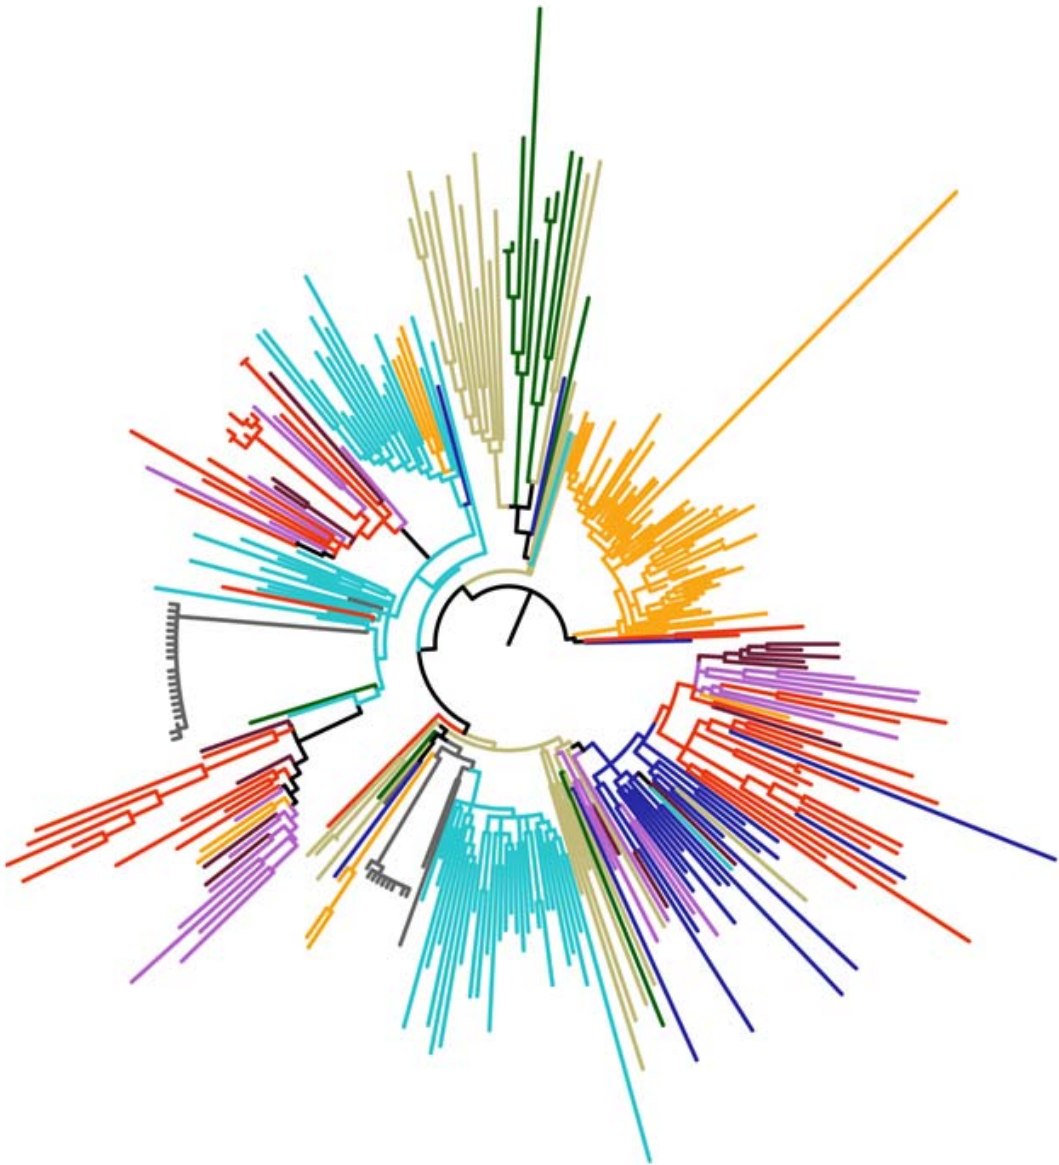

**Supplementary Figure S1. Phylogeographic trees of Core-E1.** Maximum likelihood (ML), midpoint-rooted phylogeographic tree showing HCV viral clades in different colors by country. **(A)** Core-E1 subtype 1a, **(B)** Core-E1 subtype 1b, and **(C)** Core-E1 subtype 3a.

## Supplementary Figure S2A

- Austria
- Cyprus
- France
- Germany
- Greece
- Italy
- New Zealand
- Switzerland
- Thailand
- United Kingdom
- United States
- Vietnam

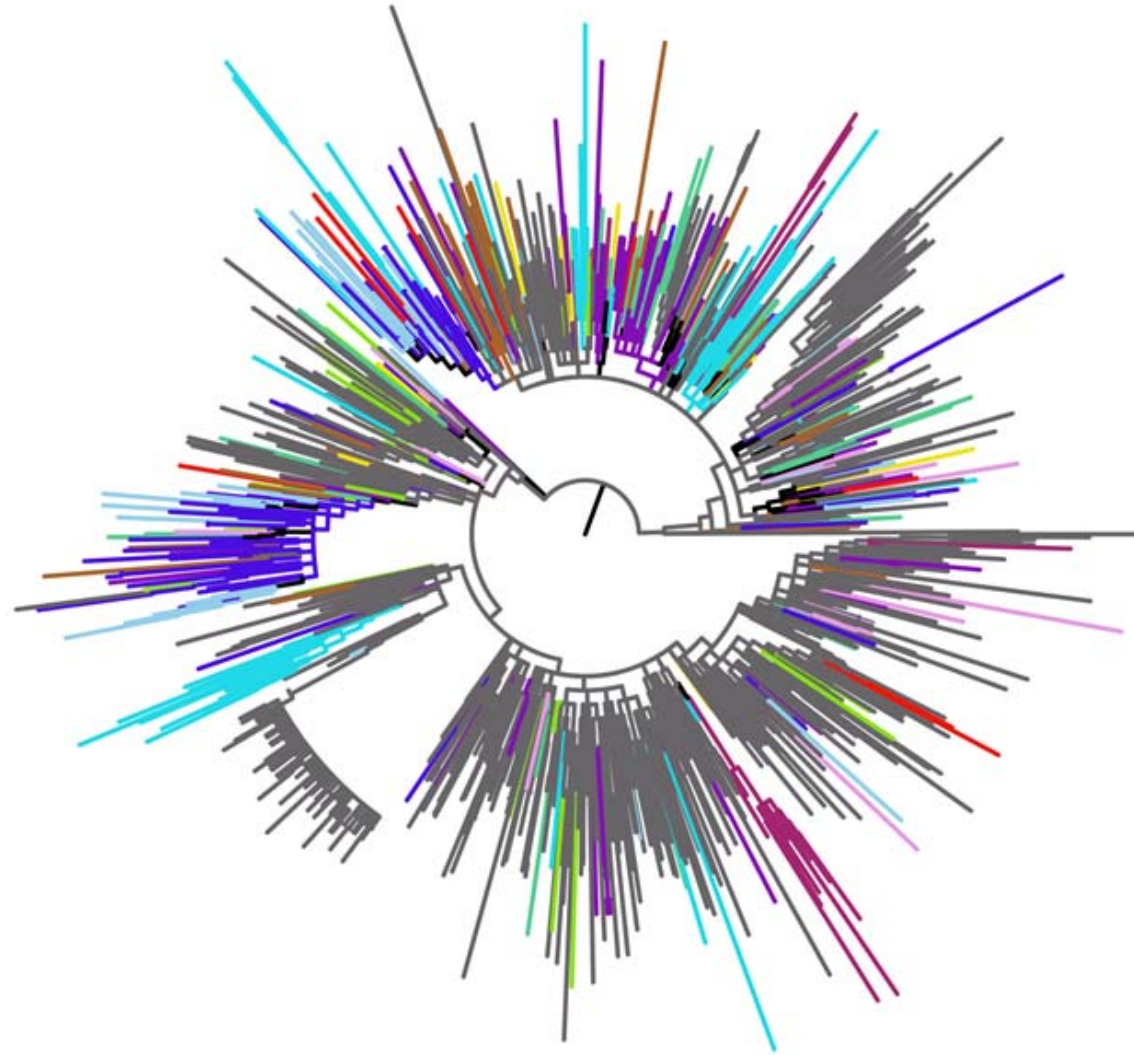

# Supplementary Figure S2B

- Australia
- China
- Cyprus
- France
- Germany
- Greece
- Ireland
- Italy
- Japan
- Netherlands
- New Zealand
- Russian Federation
- Spain
- Switzerland
- Thailand
- United Kingdom
- United States
- Vietnam

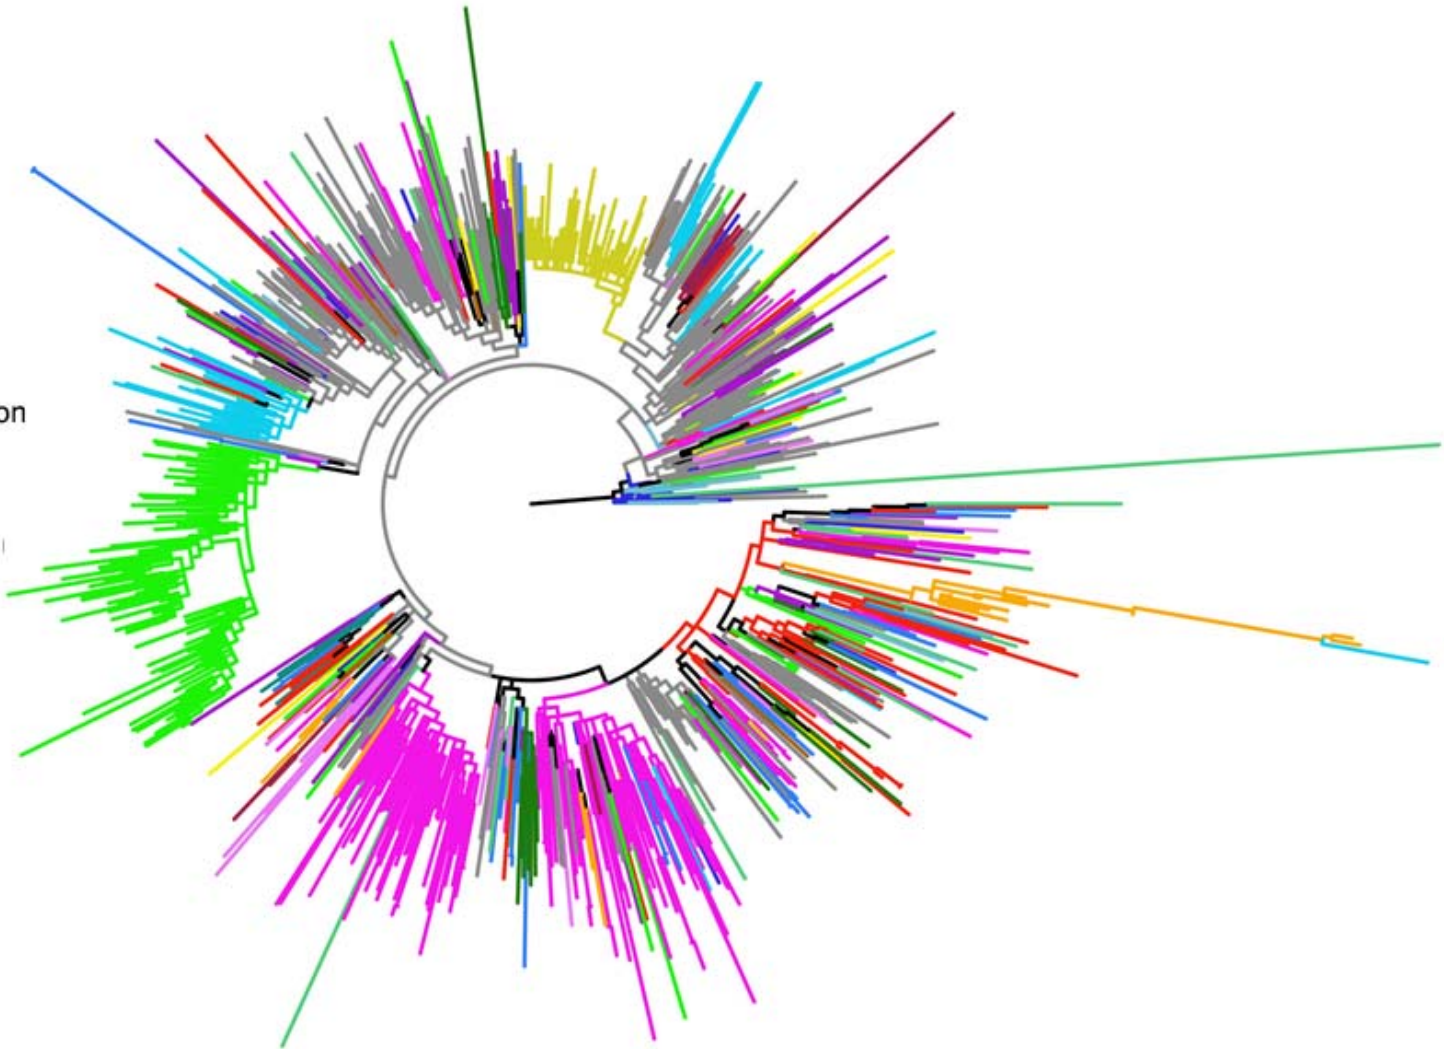

## Supplementary Figure S2C

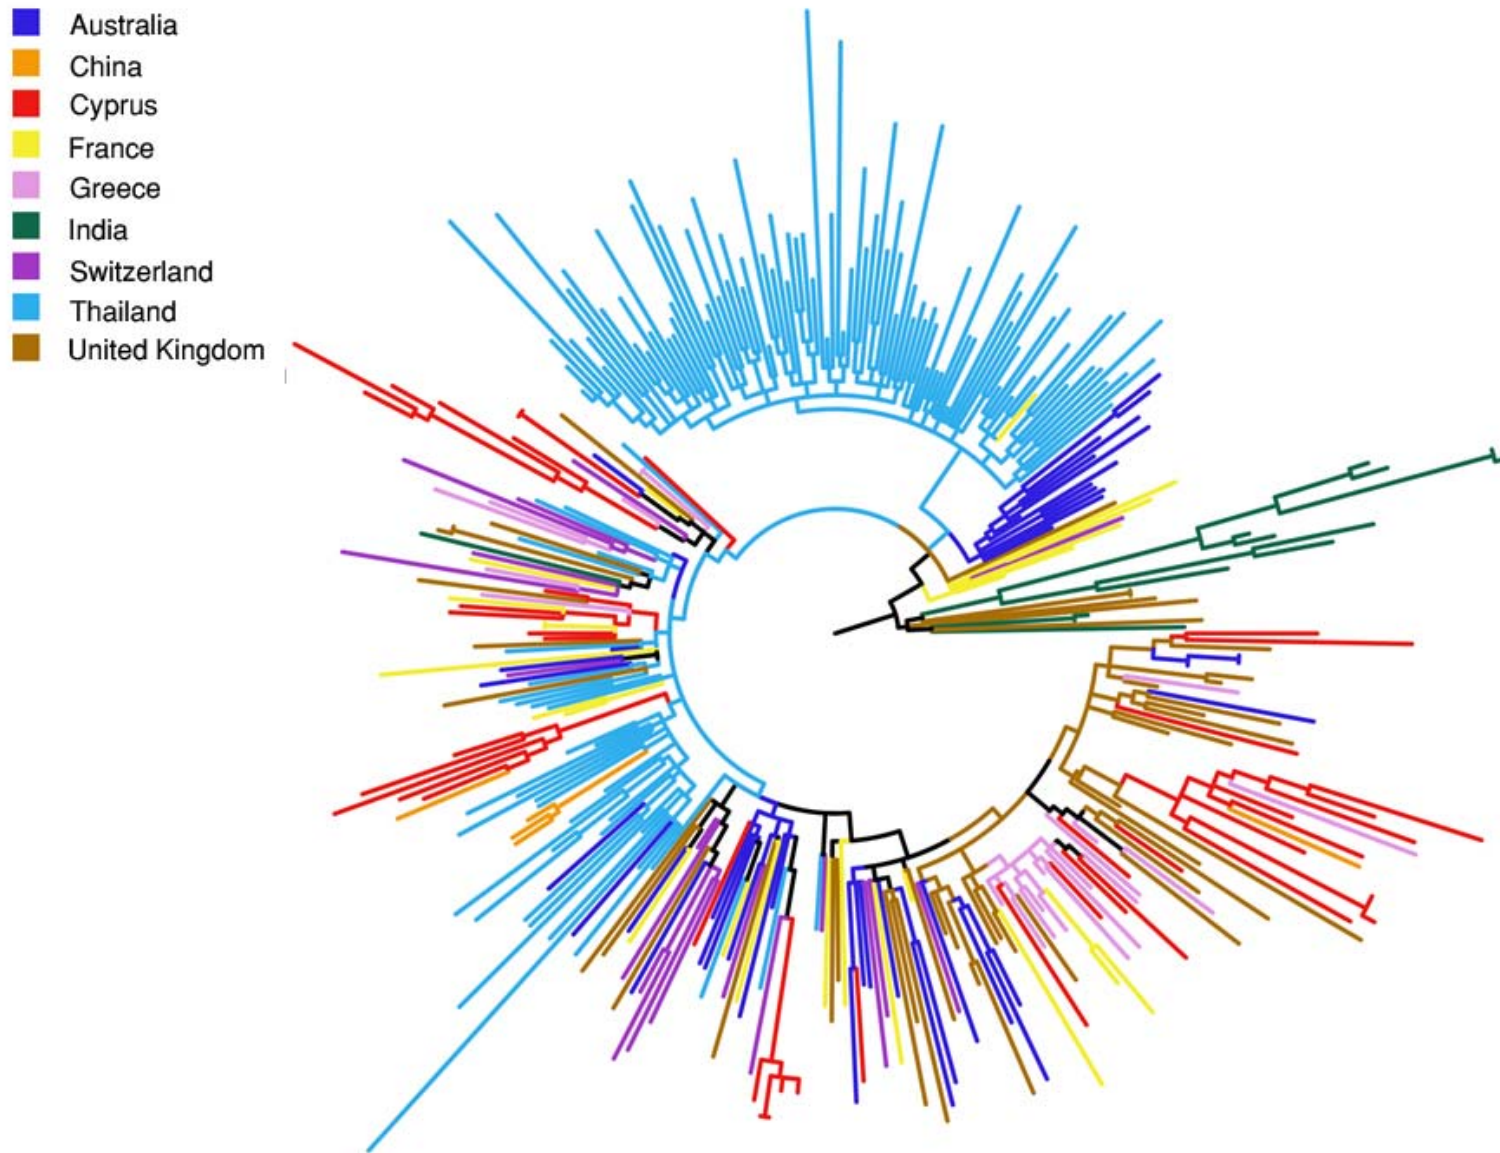

**Supplementary Figure S2. Phylogeographic trees of NS5B.** Maximum likelihood (ML), midpoint-rooted phylogeographic tree showing HCV viral clades in different colors by country. **(A)** NS5B subtype 1a, **(B)** NS5B subtype 1b, and **(C)** NS5B subtype 3a.

**Supplementary Table S1. Core-E1 Viral Mobility.** Means of observed migration events across all bootstrap trees between different countries. Cells in bold indicate statistically significant pathways (compared to the null- hypothesis of panmixis) after Bonferroni correction for multiple comparisons. Core -E1 subtype **(A)** 1a, **(B)** 1b, and **(C)** 3a.

**Supplementary Table S1a.** Mean of observed migration events across all bootstrap trees for each pathway for HCV subtype 1a encoding Core-E1 region

|                |                         | Importing to |              |              |        |              |              |              |
|----------------|-------------------------|--------------|--------------|--------------|--------|--------------|--------------|--------------|
|                |                         | China        | Cyprus       | Germany      | Japan  | Switzerland  | Thailand     | USA          |
| Exporting from | <b>China</b> (7)        |              | 0.017        | 0.010        | 0.000  | <b>0.120</b> | 0.017        | 0.000        |
|                | <b>Cyprus</b> (14)      | 0.000        |              | <b>0.051</b> | 0.000  | <b>0.098</b> | 0.015        | <b>0.081</b> |
|                | <b>Germany</b> (21)     | 0.015        | 0.015        |              | 0.005  | <b>0.042</b> | 0.005        | <b>0.125</b> |
|                | <b>Japan</b> (14)       | 0.000        | 0.000        | 0.005        |        | 0.000        | 0.000        | 0.000        |
|                | <b>Switzerland</b> (48) | 0.015        | <b>1.895</b> | <b>1.419</b> | 0.034  |              | <b>0.377</b> | <b>2.4</b>   |
|                | <b>Thailand</b> (55)    | 0.000        | <b>0.059</b> | 0.022        | 0.042  | <b>0.081</b> |              | <b>0.632</b> |
|                | <b>US</b> (1279)        | 3.850        | 6.662        | 12.017       | 12.777 | 13.748       | 4.909        |              |

Note. Cells in bold indicate statistically significant pathways (compared to the null-hypothesis of panmixis) after Bonferroni correction for multiple comparisons. USA, United States of America. For each country, the number in parenthesis indicate the number of HCV subtype 1a sequences (encoding the CORE-E1 region) isolated from and used in the analysis.



**Supplementary Table S1b.** Mean of observed migration events across all bootstrap trees for each pathway for HCV subtype 1b encoding the Core-E1 region

|                |                         | Importing to |               |               |              |         |              |              |               |              |              |              |              |
|----------------|-------------------------|--------------|---------------|---------------|--------------|---------|--------------|--------------|---------------|--------------|--------------|--------------|--------------|
|                |                         | Belarus      | China         | Cyprus        | Germany      | Ireland | Japan        | Russia       | Switzerland   | Tajikistan   | Thailand     | USA          | Uzbekistan   |
| Exporting from | <b>Belarus (16)</b>     |              | <b>0.081</b>  | <b>0.252</b>  | 0.000        | 0.000   | 0.042        | 0.012        | 0.032         | <b>0.034</b> | 0.000        | <b>0.360</b> | <b>0.279</b> |
|                | <b>China (529)</b>      | 0.208        |               | 0.975         | 0.044        | 0.000   | 5.51         | 0.262        | 0.770         | 0.659        | 0.091        | 2.306        | 0.397        |
|                | <b>Cyprus (53)</b>      | <b>0.985</b> | <b>0.760</b>  |               | <b>0.071</b> | 0.000   | <b>0.282</b> | <b>0.223</b> | <b>1.189</b>  | <b>0.951</b> | 0.017        | 0.380        | <b>0.826</b> |
|                | <b>Germany (7)</b>      | 0.000        | 0.000         | 0.000         |              | 0.000   | 0.000        | 0.000        | 0.002         | 0.005        | 0.000        | 0.000        | 0.000        |
|                | <b>Ireland (192)</b>    | 0.000        | 0.015         | 0.235         | 0.000        |         | 0.005        | 0.000        | 0.007         | 0.000        | 0.012        | 0.265        | 0.000        |
|                | <b>Japan (122)</b>      | 0.223        | <b>10.025</b> | 0.635         | 0.022        | 0.000   |              | 0.076        | <b>0.652</b>  | <b>0.409</b> | 0.049        | <b>1.892</b> | 0.137        |
|                | <b>Russia (7)</b>       | 0.005        | 0.015         | <b>0.037</b>  | 0.000        | 0.000   | 0.002        |              | 0.002         | 0.002        | 0.015        | 0.005        | 0.005        |
|                | <b>Switzerland (40)</b> | <b>0.074</b> | <b>0.377</b>  | <b>0.615</b>  | <b>0.071</b> | 0.005   | <b>0.218</b> | <b>0.056</b> |               | <b>0.093</b> | 0.049        | <b>0.488</b> | <b>0.118</b> |
|                | <b>Tajikistan (13)</b>  | <b>0.039</b> | <b>0.100</b>  | <b>0.059</b>  | 0.015        | 0.000   | 0.032        | 0.005        | <b>0.044</b>  |              | 0.002        | 0.034        | <b>0.056</b> |
|                | <b>Thailand (39)</b>    | 0.002        | <b>1.002</b>  | 0.047         | 0.007        | 0.000   | 0.049        | 0.015        | <b>0.100</b>  | 0.015        |              | <b>0.588</b> | 0.002        |
|                | <b>US (274)</b>         | <b>3.407</b> | 7.221         | <b>13.243</b> | <b>3.887</b> | 0.902   | <b>8.88</b>  | <b>2.098</b> | <b>15.385</b> | <b>2.588</b> | <b>5.990</b> |              | <b>3.358</b> |
|                | <b>Uzbekistan (12)</b>  | <b>0.091</b> | 0.029         | <b>0.284</b>  | 0.000        | 0.000   | 0.012        | 0.012        | <b>0.078</b>  | <b>0.159</b> | 0.002        | 0.017        |              |

Note. Cells in bold indicate statistically significant pathways (compared to the null-hypothesis of panmixis) after Bonferroni correction for multiple comparisons. USA, United States of America. For each country, the number in parenthesis indicate the number of HCV subtype 1b sequences (encoding the CORE-E1 region) isolated from and used in the analysis.

**Supplementary Table S1c.** Mean of observed migration events across all bootstrap trees for each pathway for HCV subtype 3a encoding Core-E1 region

|                |                        | Importing to |              |              |              |              |              |              |              |              |
|----------------|------------------------|--------------|--------------|--------------|--------------|--------------|--------------|--------------|--------------|--------------|
|                |                        | Belarus      | China        | Cyprus       | India        | Pakistan     | Thailand     | GB           | USA          | Uzbekistan   |
| Exporting from | <b>Belarus</b> (16)    |              | 0.147        | <b>0.526</b> | 0.009        | 0.026        | 0.022        | <b>0.289</b> | 0.009        | <b>0.458</b> |
|                | <b>China</b> (70)      | 0.018        |              | 0.072        | 0.031        | 0.211        | 0.175        | 0.105        | 0.009        | 0.048        |
|                | <b>Cyprus</b> (44)     | <b>1.487</b> | 0.377        |              | 0.031        | 0.079        | 0.121        | <b>1.423</b> | 0.057        | <b>1.873</b> |
|                | <b>India</b> (24)      | 0.004        | 0.026        | 0.011        |              | 0.169        | 0.046        | 0.116        | 0.044        | 0.050        |
|                | <b>Pakistan</b> (28)   | 0.208        | 0.401        | <b>0.590</b> | <b>1.583</b> |              | <b>0.91</b>  | <b>1.175</b> | <b>0.511</b> | <b>0.649</b> |
|                | <b>Thailand</b> (65)   | 0.107        | 1.632        | 1.379        | 0.919        | 0.941        |              | 0.787        | 1.728        | 0.417        |
|                | <b>GB</b> (22)         | <b>1.825</b> | 0.265        | <b>1.682</b> | <b>0.257</b> | <b>0.866</b> | <b>1.026</b> |              | 0.204        | <b>1.173</b> |
|                | <b>US</b> (43)         | 0.018        | 0.079        | 0.046        | 0.081        | 0.057        | 0.246        | 0.046        |              | 0.094        |
|                | <b>Uzbekistan</b> (25) | <b>1.875</b> | <b>0.770</b> | <b>2.270</b> | 0.053        | 0.169        | 0.057        | 0.294        | 0.061        |              |

Note. Cells in bold indicate statistically significant pathways (compared to the null-hypothesis of panmixis) after Bonferroni correction for multiple comparisons. GB, United Kingdom; USA, United States of America. For each country, the number in parenthesis indicate the number of HCV subtype 3a sequences (encoding the CORE-E1 region) isolated from and used in the analysis.

**Supplementary Table S2. NS5B Viral Mobility.** Means of observed migration events across all bootstrap trees between different countries. Cells in bold indicate statistically significant pathways (compared to the null- hypothesis of panmixis) after Bonferroni correction for multiple comparisons. NS5B subtype **(A)** 1a, **(B)** 1b, and **(C)** 3a.

**Supplementary Table S2a.** Mean of observed migration events across all bootstrap trees for each pathway for HCV subtype 1a encoding NS5B region

|                     |                         | Importing to |              |              |              |              |              |              |              |              |              |              |              |
|---------------------|-------------------------|--------------|--------------|--------------|--------------|--------------|--------------|--------------|--------------|--------------|--------------|--------------|--------------|
|                     |                         | Australia    | Cyprus       | France       | Germany      | Greece       | Italy        | New Zealand  | Switzerland  | Thailand     | GB           | USA          | Vietnam      |
| Exporting from      | <b>Australia</b> (71)   |              | <b>0.557</b> | <b>0.183</b> | <b>0.863</b> | <b>0.437</b> | <b>0.733</b> | <b>7.173</b> | <b>2.343</b> | <b>1.087</b> | <b>2.013</b> | <b>1.683</b> | 0.027        |
|                     | <b>Cyprus</b> (11)      | 0.017        |              | 0.000        | 0.000        | 0.003        | 0.007        | 0.03         | 0.017        | 0.017        | 0.000        | 0.020        | 0.007        |
|                     | <b>France</b> (15)      | <b>0.160</b> | 0.003        |              | <b>0.057</b> | <b>0.090</b> | 0.027        | 0.000        | <b>0.043</b> | 0.050        | 0.010        | <b>0.107</b> | 0.000        |
|                     | <b>Germany</b> (32)     | <b>0.140</b> | 0.010        | 0.007        |              | 0.037        | 0.030        | 0.027        | 0.087        | 0.043        | 0.043        | <b>0.233</b> | 0.013        |
|                     | <b>Greece</b> (24)      | 0.027        | 0.020        | 0.043        | <b>0.110</b> |              | 0.037        | 0.01         | 0.043        | 0.010        | 0.057        | 0.043        | 0.000        |
|                     | <b>Italy</b> (32)       | <b>0.230</b> | <b>0.043</b> | <b>0.127</b> | <b>0.213</b> | <b>0.203</b> |              | <b>0.063</b> | <b>0.643</b> | <b>0.147</b> | <b>0.397</b> | <b>0.283</b> | 0.040        |
|                     | <b>New Zealand</b> (49) | <b>3.470</b> | <b>0.430</b> | 0.037        | 0.110        | <b>0.117</b> | <b>0.200</b> |              | <b>0.370</b> | <b>0.837</b> | <b>0.613</b> | <b>0.443</b> | 0.003        |
|                     | <b>Switzerland</b> (80) | <b>0.923</b> | <b>0.873</b> | <b>0.687</b> | <b>1.337</b> | <b>1.367</b> | <b>2.947</b> | <b>0.317</b> |              | <b>0.873</b> | <b>1.233</b> | <b>2.213</b> | <b>0.323</b> |
|                     | <b>Thailand</b> (70)    | <b>0.627</b> | <b>0.253</b> | <b>0.460</b> | 0.067        | <b>0.230</b> | <b>0.527</b> | <b>0.31</b>  | <b>0.830</b> |              | <b>1.090</b> | <b>1.833</b> | <b>0.753</b> |
|                     | <b>GB</b> (42)          | <b>0.297</b> | <b>0.150</b> | <b>0.137</b> | <b>0.103</b> | <b>0.210</b> | <b>0.177</b> | <b>0.200</b> | <b>0.797</b> | <b>0.370</b> |              | <b>0.673</b> | 0.053        |
|                     | <b>US</b> (629)         | 14.58        | 3.627        | 6.060        | 16.93        | 11.843       | 9.033        | 9.643        | 23.293       | 17.22        | 13.157       |              | 3.613        |
| <b>Vietnam</b> (21) | 0.003                   | 0.003        | 0.000        | 0.000        | 0.000        | 0.000        | 0.000        | 0.003        | 0.063        | 0.000        | 0.047        |              |              |

Note. Cells in bold indicate statistically significant pathways (compared to the null-hypothesis of panmixis) after Bonferroni correction for multiple comparisons. GB, United Kingdom; and USA, United States of America. For each country, the number in parenthesis indicate the number of HCV subtype 1a sequences (encoding the NS5B region) isolated from and used in the analysis.

|                |              | Importing to |              |              |              |              |              |       |              |              |              |              |              |              |              |              |              |              |       |
|----------------|--------------|--------------|--------------|--------------|--------------|--------------|--------------|-------|--------------|--------------|--------------|--------------|--------------|--------------|--------------|--------------|--------------|--------------|-------|
|                |              | AU           | CN           | CY           | FR           | DE           | GR           | IE    | IT           | JP           | NL           | NZ           | RU           | ES           | CH           | TH           | GB           | USA          | VN    |
| Importing from | AU (26)      |              | 0.006        | 0.086        | 0.039        | 0.208        | 0.064        | 0.000 | <b>0.161</b> | 0.094        | 0.006        | <b>0.908</b> | 0.139        | 0.05         | <b>0.153</b> | <b>0.183</b> | 0.008        | <b>0.422</b> | 0.000 |
|                | CN (23)      | 0.000        |              | 0.025        | 0.014        | 0.036        | 0.017        | 0.000 | 0.022        | <b>0.267</b> | 0.000        | 0.000        | 0.039        | 0.003        | 0.039        | <b>0.783</b> | 0.000        | 0.081        | 0.05  |
|                | CY (54)      | <b>0.575</b> | 0.05         |              | <b>0.150</b> | 0.569        | <b>0.383</b> | 0.006 | <b>1.408</b> | 0.742        | 0.114        | <b>0.558</b> | <b>1.078</b> | <b>1.600</b> | <b>0.65</b>  | 0.189        | <b>0.144</b> | <b>0.661</b> | 0.036 |
|                | FR (12)      | 0.017        | 0.008        | <b>0.067</b> |              | 0.014        | 0.006        | 0.003 | 0.017        | 0.031        | 0.006        | 0.003        | 0.008        | 0.028        | 0.017        | 0.008        | 0.006        | 0.006        | 0.003 |
|                | DE (148)     | 0.053        | 0.019        | 0.336        | 0.058        |              | 0.142        | 0.003 | 0.289        | 0.131        | 0.003        | 0.017        | 0.128        | 0.092        | 0.456        | 0.144        | 0.025        | 0.711        | 0.014 |
|                | GR (22)      | 0.033        | 0.003        | <b>0.233</b> | 0.042        | 0.083        |              | 0.000 | <b>0.108</b> | 0.094        | 0.006        | 0.006        | <b>0.161</b> | <b>0.097</b> | 0.086        | 0.006        | 0.019        | 0.083        | 0.014 |
|                | IE (72)      | 0.011        | 0.011        | 0.028        | 0.008        | 0.000        | 0.028        |       | 0.022        | 0.264        | 0.000        | 0.000        | 0.025        | 0.028        | 0.081        | 0.019        | 0.000        | 0.742        | 0.061 |
|                | IT (30)      | 0.069        | 0.028        | <b>0.358</b> | <b>0.192</b> | 0.256        | <b>0.144</b> | 0.000 |              | <b>0.278</b> | 0.011        | 0.081        | <b>0.214</b> | 0.075        | <b>0.203</b> | 0.022        | 0.014        | 0.164        | 0.000 |
|                | JP (153)     | 1.825        | <b>2.753</b> | 1.714        | 0.35         | 1.131        | 0.783        | 0.831 | 2.056        |              | 0.033        | 0.083        | 1.725        | 1.061        | 1.306        | 0.842        | 0.183        | 4.031        | 0.444 |
|                | NL (6)       | <b>0.036</b> | 0.000        | <b>0.536</b> | 0.006        | 0.000        | 0.008        | 0.000 | 0.014        | 0.006        |              | 0.000        | <b>0.714</b> | 0.003        | <b>0.064</b> | 0.000        | 0.000        | 0.008        | 0.000 |
|                | NZ (13)      | <b>0.622</b> | 0.003        | <b>0.094</b> | 0.053        | 0.036        | 0.022        | 0.000 | <b>0.131</b> | 0.053        | 0.003        |              | 0.039        | 0.022        | 0.058        | <b>0.269</b> | 0.008        | <b>0.233</b> | 0.000 |
|                | RU (38)      | 0.061        | 0.036        | <b>0.744</b> | 0.075        | 0.253        | <b>0.322</b> | 0.003 | <b>0.336</b> | 0.164        | <b>0.178</b> | 0.058        |              | 0.122        | <b>0.506</b> | 0.039        | 0.022        | 0.208        | 0.011 |
|                | ES (33)      | 0.131        | 0.022        | <b>0.789</b> | <b>0.267</b> | 0.094        | 0.131        | 0.003 | <b>0.483</b> | 0.142        | 0.017        | 0.006        | <b>0.300</b> |              | <b>0.769</b> | 0.022        | 0.033        | <b>0.433</b> | 0.000 |
|                | CH (49)      | 0.142        | 0.028        | <b>0.411</b> | <b>0.233</b> | <b>0.556</b> | 0.192        | 0.014 | <b>0.311</b> | 0.233        | 0.022        | 0.067        | 0.253        | <b>0.528</b> |              | 0.064        | 0.083        | 0.464        | 0.014 |
|                | TH (48)      | 0.008        | 0.003        | 0.331        | 0.006        | <b>0.553</b> | 0.036        | 0.003 | <b>0.575</b> | 0.044        | 0.000        | 0.042        | 0.019        | 0.044        | <b>1.186</b> |              | 0.056        | <b>1.783</b> | 0.011 |
| GB (7)         | 0.003        | 0.000        | 0.003        | 0.000        | 0.000        | 0.000        | 0.000        | 0.000 | 0.000        | 0.000        | 0.000        | 0.000        | 0.000        | 0.003        | 0.000        |              | 0.000        | 0.000        |       |
| US (231)       | <b>7.569</b> | 0.767        | 10.011       | <b>4.358</b> | 9.111        | <b>7.572</b> | 1.053        | 6.961 | 11.381       | 0.744        | 2.328        | 7.831        | 8.081        | 13.317       | 5.408        | <b>3.500</b> |              | 1.728        |       |
| VN (12)        | <b>0.489</b> | 0.000        | <b>0.181</b> | 0.006        | 0.000        | 0.003        | 0.003        | 0.006 | 0.014        | 0.000        | 0.000        | 0.003        | 0.003        | 0.000        | 0.025        | 0.000        | <b>0.492</b> |              |       |

**Supplementary Table S2b.** Mean of observed migration events across all bootstrap trees for each pathway for HCV subtype 1b encoding NS5B region

Note. Cells in bold indicate statistically significant pathways (compared to the null-hypothesis of panmixis) after Bonferroni correction for multiple comparisons. AU, Australia; CN, China; CY, Cyprus; FR, France; DE, Germany; GR, Greece; IE, Ireland; IT, Italy; JP, Japan; NL, Netherlands; RU, Russian Federation; ES, Spain; CH, Switzerland; TH, Thailand; GB, United Kingdom; USA, United States of America and VN, Vietnam. For each country, the number in parenthesis indicate the number of HCV subtype 1b sequences (encoding the NS5B region) isolated from and used in the analysis.

**Supplementary Table S2c.** Mean of observed migration events across all bootstrap trees for each pathway for HCV subtype 3a encoding NS5B region

|                |                         | Importing to |              |              |              |              |              |              |              |              |
|----------------|-------------------------|--------------|--------------|--------------|--------------|--------------|--------------|--------------|--------------|--------------|
|                |                         | Australia    | China        | Cyprus       | France       | Greece       | India        | Switzerland  | Thailand     | GB           |
| Exporting from | <b>Australia</b> (42)   |              | 0.081        | <b>1.103</b> | <b>1.175</b> | 0.431        | 0.314        | <b>0.722</b> | <b>1.283</b> | <b>1.253</b> |
|                | <b>China</b> (5)        | 0.000        |              | 0.000        | 0.000        | 0.000        | 0.000        | 0.003        | 0.003        | 0.006        |
|                | <b>Cyprus</b> (45)      | 0.475        | <b>1.831</b> |              | <b>0.972</b> | <b>1.197</b> | 0.222        | 0.478        | 0.328        | 0.650        |
|                | <b>France</b> (25)      | <b>0.458</b> | 0.008        | 0.325        |              | 0.167        | 0.053        | <b>0.350</b> | 0.222        | <b>0.497</b> |
|                | <b>Greece</b> (22)      | <b>0.275</b> | 0.003        | <b>2.383</b> | <b>0.986</b> |              | 0.006        | <b>0.192</b> | 0.042        | <b>1.214</b> |
|                | <b>India</b> (15)       | 0.008        | 0.000        | 0.008        | 0.019        | 0.006        |              | 0.022        | 0.039        | 0.119        |
|                | <b>Switzerland</b> (19) | <b>0.647</b> | 0.017        | <b>0.325</b> | <b>0.514</b> | <b>0.642</b> | 0.119        |              | <b>0.325</b> | <b>0.608</b> |
|                | <b>Thailand</b> (130)   | 4.319        | 0.461        | 1.292        | 3.139        | 0.667        | 0.653        | 2.206        |              | 2.447        |
|                | <b>GB</b> (58)          | <b>5.083</b> | 0.053        | <b>2.756</b> | <b>2.661</b> | <b>2.425</b> | <b>0.867</b> | <b>1.636</b> | 0.842        |              |

Note. Cells in bold indicate statistically significant pathways (compared to the null-hypothesis of panmixis) after Bonferroni correction for multiple comparisons. GB, United Kingdom. For each country, the number in parenthesis indicate the number of HCV subtype 3a sequences (encoding the NS5B region) isolated from and used in the analysis.
